# Supplementary material for: Design of Non-Haemolytic Nanoemulsions for Intravenous Administration of Hydrophobic APIs
Source: PubMed Central journal article supplement (PMC7760703; doi:10.3390/pharmaceutics12121141), 2020-11-25
Supplement: pharmaceutics-12-01141-s001.pdf [file pharmaceutics-12-01141-s001.pdf]

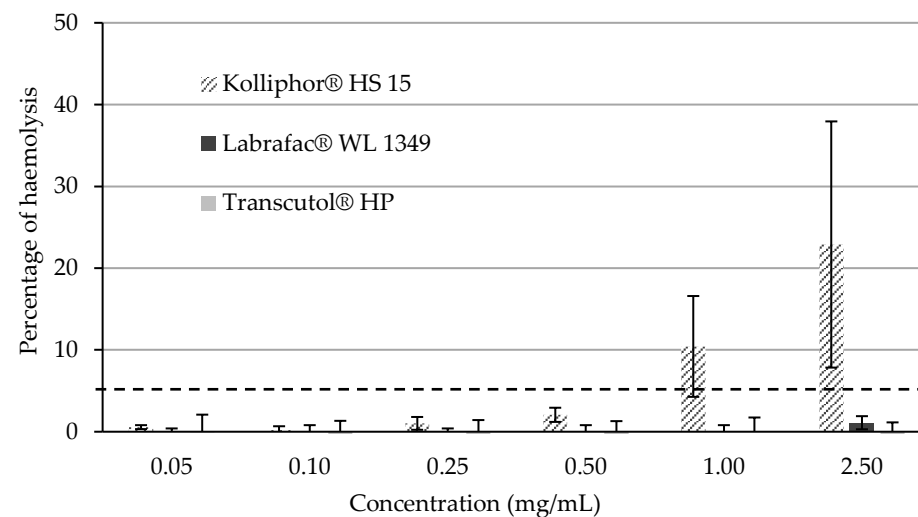

**Figure S1.** Results of the haemolysis test for the chosen excipients: the dotted line represents the threshold value of 5%. Note: Data are shown as mean  $\pm$  standard deviation ( $n = 3$ ).

**Table S1.** Mixture design comprising 12 experiments where the central point was triplicated.

| Trial | X <sub>1</sub> : Labrafac® WL<br>1349 (% w/w) | X <sub>2</sub> : Kolliphor® HS 15<br>(% w/w) | X <sub>3</sub> : Transcutol® HP<br>(% w/w) | Y <sub>1</sub> : Average Diameter<br>(nm) | Y <sub>2</sub> : PDI |
|-------|-----------------------------------------------|----------------------------------------------|--------------------------------------------|-------------------------------------------|----------------------|
| 1     | 60                                            | 30                                           | 10                                         | 179.0                                     | 0.480                |
| 2     | 10                                            | 80                                           | 10                                         | 17.7                                      | 0.098                |
| 3     | 10                                            | 30                                           | 60                                         | 34.1                                      | 0.236                |
| 4     | 35                                            | 55                                           | 10                                         | 49.7                                      | 0.182                |
| 5     | 35                                            | 30                                           | 35                                         | 242.8                                     | 0.400                |
| 6     | 10                                            | 55                                           | 35                                         | 25.1                                      | 0.183                |
| 7     | 43.3                                          | 38.3                                         | 18.3                                       | 152.1                                     | 0.217                |
| 8     | 18.3                                          | 63.3                                         | 18.3                                       | 23.9                                      | 0.090                |
| 9     | 18.3                                          | 38.3                                         | 43.3                                       | 71.5                                      | 0.234                |
| 10    | 26.7                                          | 46.7                                         | 26.7                                       | 61.3                                      | 0.204                |
| 11    | 26.7                                          | 46.7                                         | 26.7                                       | 67.6                                      | 0.245                |
| 12    | 26.7                                          | 46.7                                         | 26.7                                       | 77.4                                      | 0.207                |

**Table S2.** Names, structures and characteristics of tested excipients

| Trade name                      | Denomination                                                                                                                                                                                                                    | Molecular structure                                                                                                                                                                                                                                                                                                                                                                                                                                                                                                                                                                           | Typical properties                                                                    |
|---------------------------------|---------------------------------------------------------------------------------------------------------------------------------------------------------------------------------------------------------------------------------|-----------------------------------------------------------------------------------------------------------------------------------------------------------------------------------------------------------------------------------------------------------------------------------------------------------------------------------------------------------------------------------------------------------------------------------------------------------------------------------------------------------------------------------------------------------------------------------------------|---------------------------------------------------------------------------------------|
| <p><b>Labrafac® WL 1349</b></p> | <p>Medium chain triglyceride</p> <p><i>Fatty acid composition: Caprylic acid (50 to 80%) and capric acid (20 to 50%)</i></p>                                                                                                    | 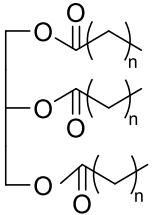 <p style="text-align: center;"><b>Glycerides, mixed decanoyl and octanoyl</b></p>                                                                                                                                                                                                                                                                                                                                                                                                                         | <ul style="list-style-type: none"> <li>• MW = 512 g/mol</li> <li>• HLB = 1</li> </ul> |
| <p><b>Miglyol® 812 N</b></p>    | <p>Medium chain triglyceride</p> <p><i>Fatty acid composition: Caprylic acid (50 to 65%) and capric acid (30 to 45%)</i></p>                                                                                                    |  <p style="text-align: center;"><b>Glycerides, mixed decanoyl and octanoyl</b></p>                                                                                                                                                                                                                                                                                                                                                                                                                         | <ul style="list-style-type: none"> <li>• HLB = 1</li> </ul>                           |
| <p><b>Maisine® CC</b></p>       | <p>Glycerol monolinoleate</p> <p><i>Fatty acid composition: Linoleic acid (≥50%), oleic acid (10 to 35%), palmitic acid (4 to 20%), stearic acid (≤6%) and traces of linolenic acid, arachidic acid and eicosenoic acid</i></p> | <p>Monoglyceride (32 to 52%):</p>  <p>Diglyceride (40 to 55%):</p>  <p>Triglyceride (5 to 20%):</p>  <p>R =</p>  <p style="text-align: center;"><b>Mixture of mono-, di- and triglycerides of oleic and linoleic acid (C18 :1/C18:2)</b></p> | <ul style="list-style-type: none"> <li>• HLB = 1</li> </ul>                           |

|                                      |                                                                                                                                                                                                                                 |                                                                                                                                                                                                                                                                                                                                                                                                                                                                                                                                           |                                                                                          |
|--------------------------------------|---------------------------------------------------------------------------------------------------------------------------------------------------------------------------------------------------------------------------------|-------------------------------------------------------------------------------------------------------------------------------------------------------------------------------------------------------------------------------------------------------------------------------------------------------------------------------------------------------------------------------------------------------------------------------------------------------------------------------------------------------------------------------------------|------------------------------------------------------------------------------------------|
| <p><b>Peceol®</b></p>                | <p>Glycerol mono-oleate (type 40)</p> <p><i>Fatty acid composition: Oleic acid (≥60%), linoleic acid (≤35%), palmitic acid (≤12%), stearic acid (≤6%) and traces of arachidic acid, eicosenoic acid and linolenic acid</i></p>  | <p>Monoglyceride (32 to 52%): 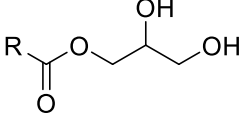</p> <p>Diglyceride (30 to 50%): </p> <p>Triglyceride (5 to 20%): </p> <p>R = </p> <p><b>Mixture of mono-, di- and triglycerides of oleic acid (C18 :1)</b></p> | <ul style="list-style-type: none"> <li>• MW = 356.55 g/mol</li> <li>• HLB = 1</li> </ul> |
| <p><b>Plurol® Oléique CC 497</b></p> | <p>Polyglycerol-3 dioleate</p> <p><i>Fatty acid composition : Oleic acid (65 to 88%), linoleic acid (5 to 18%), palmitic acid (2 to 16%) and traces of linolenic acid, myristic acid, palmitoleic acid and stearic acid</i></p> | <p></p> <p>R = </p> <p><b>Polyglycerol-3 esters of oleic acid (C18 :1)</b><br/>(Mixture of mono-, di-, tri-, tetra- and pentaesters of triglycérol)</p>                                                                                                                                                                                                             | <ul style="list-style-type: none"> <li>• HLB = 3</li> </ul>                              |
| <p><b>Lipoid® E PC</b></p>           | <p>Egg yolk phosphatidylcholine</p> <p><i>Fatty acid composition: Palmitic acid (33%), oleic acid (27%), linoleic acid (17%), stearic acid (14%), arachidonic acid (4%), and palmitoleic acid (1%)</i></p>                      | <p></p> <p><b>Phosphatidylcholine</b></p> <p>R =</p> <p>Palmitic acid (C16:0) </p> <p>Oleic acid (C18:1) </p> <p>Linoleic acid (C18:2) </p>                                            | <ul style="list-style-type: none"> <li>• MW = 775 g/mol</li> <li>• HLB ≈ 6.58</li> </ul> |

|                                  |                                                                                                                                                                             |                                                                                                                                                                                                                                                                                                                                                                                                                                                                                  |                                                                                                                              |
|----------------------------------|-----------------------------------------------------------------------------------------------------------------------------------------------------------------------------|----------------------------------------------------------------------------------------------------------------------------------------------------------------------------------------------------------------------------------------------------------------------------------------------------------------------------------------------------------------------------------------------------------------------------------------------------------------------------------|------------------------------------------------------------------------------------------------------------------------------|
| <p><b>Lipoid® S 100</b></p>      | <p>Soy phosphatidylcholine</p> <p><i>Fatty acid composition: Linoleic acid (62%), palmitic acid (15%), oleic acid (12%), linolenic acid (5%), and stearic acid (3%)</i></p> | 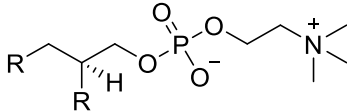 <p><b>Phosphatidylcholine</b></p> <p>R =</p> <p>Palmitic acid (C16:0) </p> <p>Oleic acid (C18:1) </p> <p>Linoleic acid (C18:2) </p> | <ul style="list-style-type: none"> <li>• MW = 786 g/mol</li> <li>• HLB ≈ 6.49</li> </ul>                                     |
| <p><b>Lipoid® S LPC 80</b></p>   | <p>Soy lysophosphatidylcholine</p> <p><i>MAPC (80%), Phosphatidylcholine (13%) with various fatty acid: linoleic, palmitic, stearic, and oleic acids</i></p>                |  <p><b>Monoacyl phosphatidylcholine (MAPC)</b></p>                                                                                                                                                                                                                                                                                                                                             | <ul style="list-style-type: none"> <li>• MW ≈ 522 g/mol</li> <li>• HLB ≈ 9.77</li> </ul>                                     |
| <p><b>Kollisolv® PEG 400</b></p> | <p>Polyethylene glycol (PEG)</p>                                                                                                                                            |  <p><b>Polyethylene glycol</b></p>                                                                                                                                                                                                                                                                                                                                                            | <ul style="list-style-type: none"> <li>• MW = 400 g/mol</li> <li>• HLB = 14</li> </ul>                                       |
| <p><b>Kolliphor® HS15</b></p>    | <p>Macrogol 15 hydroxystearate</p> <p><i>70% of polyglycol mono- and di-esters of 12-hydroxystearic acid (PEG 660), 30% of free PEG</i></p>                                 |  <p><b>Polyethylene glycol 660 12-hydroxystearate</b></p>                                                                                                                                                                                                                                                                                                                                    | <ul style="list-style-type: none"> <li>• MW = 911 g/mol</li> <li>• HLB = 14-16</li> <li>• CMC = 0.005-0.02%</li> </ul>       |
| <p><b>Kolliphor® EL</b></p>      | <p>Macrogolglycerol ricinoleate</p>                                                                                                                                         |  <p><math>x + y + z = 35</math></p>                                                                                                                                                                                                                                                                                                                                                          | <ul style="list-style-type: none"> <li>• MW ≈ 2500 g/mol</li> <li>• HLB = 12-14</li> <li>• CMC = 0.2% w/w at 37°C</li> </ul> |
| <p><b>Kollisolv® PG</b></p>      | <p>Propylene glycol</p>                                                                                                                                                     |  <p><b>1,2 Propandiol</b></p>                                                                                                                                                                                                                                                                                                                                                               | <ul style="list-style-type: none"> <li>• MW = 76.09 g/mol</li> </ul>                                                         |

|                                |                                                                                                                                                                                                                                     |                                                                                                                                                                                                                                                                                                                                                                                                                                                                                                                                                                                                                                                                                                                                                                          |                                                                                                       |
|--------------------------------|-------------------------------------------------------------------------------------------------------------------------------------------------------------------------------------------------------------------------------------|--------------------------------------------------------------------------------------------------------------------------------------------------------------------------------------------------------------------------------------------------------------------------------------------------------------------------------------------------------------------------------------------------------------------------------------------------------------------------------------------------------------------------------------------------------------------------------------------------------------------------------------------------------------------------------------------------------------------------------------------------------------------------|-------------------------------------------------------------------------------------------------------|
| <p><b>Captex® 200</b></p>      | <p>Propylene glycol dicaprylocaprate</p>                                                                                                                                                                                            | 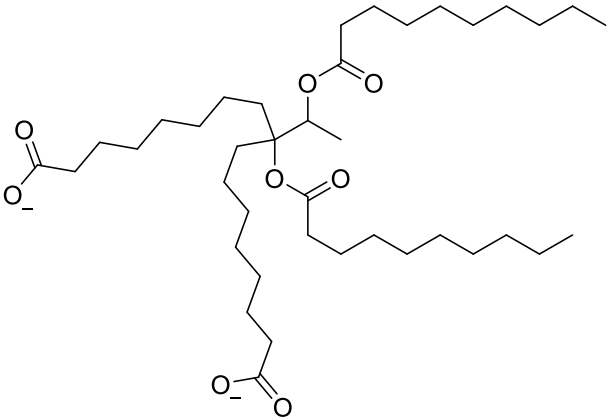 <p>Mixed diesters of caprylic/capric acids of propylene glycol</p>                                                                                                                                                                                                                                                                                                                                                                                                                                                                                                                                                                                                                    |                                                                                                       |
| <p><b>Labrafil® M 1944</b></p> | <p>Oleoyl macrogol-6 glycerides</p> <p><i>Fatty acid composition: Oleic acid (58 to 80%), linoleic acid (15 to 35%), palmitic acid (4 to 9%) and traces of arachidic acid, eicosenoic acid, linolenic acid and stearic acid</i></p> | <p>Monoglyceride: </p> <p>Diglyceride: </p> <p>Triglyceride: </p> <p>PEG<sub>300</sub> monoester: </p> <p>PEG<sub>300</sub> diester: </p> <p>R = </p> <p>Mono-, di- and triglycerides and mono- and di- PEG-6 esters of oleic acid (C18 :1)</p> | <ul style="list-style-type: none"> <li>• HLB = 3 or 9 (according to the considered source)</li> </ul> |

Labrafil® M 2125

Linoleoyl macrogol-6 glycerides

*Fatty acid composition: Linoleic acid (50 to 65%), oleic acid (20 to 35%), palmitic acid (4 to 20%) and traces of arachidic acid, eicosenoic acid, linolenic acid and stearic acid*

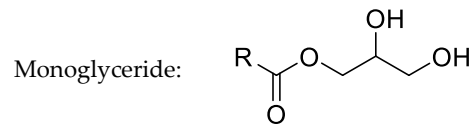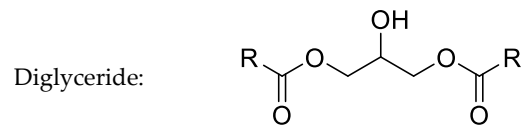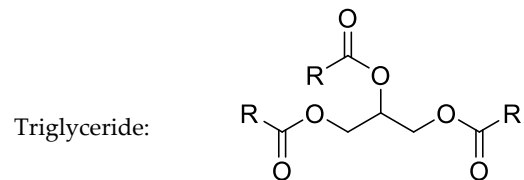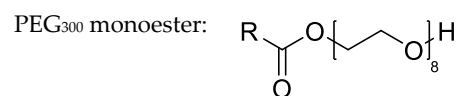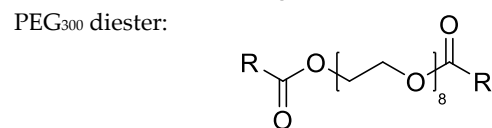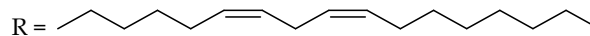

**Mono-, di- and triglycerides and mono- and di- PEG-6 esters of linoleic acid (C18 :2)**

- HLB = 3 or 9 (according to the considered source)

|                              |                                                                                                                                                                                                                   |                                                                                                                                                                                                                                                                                                                                                                                                                                                                                                                                                                                                                                                                                                                                                                                         |                                                                                                                  |
|------------------------------|-------------------------------------------------------------------------------------------------------------------------------------------------------------------------------------------------------------------|-----------------------------------------------------------------------------------------------------------------------------------------------------------------------------------------------------------------------------------------------------------------------------------------------------------------------------------------------------------------------------------------------------------------------------------------------------------------------------------------------------------------------------------------------------------------------------------------------------------------------------------------------------------------------------------------------------------------------------------------------------------------------------------------|------------------------------------------------------------------------------------------------------------------|
| <p><b>Labrasol®</b></p>      | <p>Caprylocaproyl macrogol-8 glycerides</p> <p><i>Fatty acid composition: Caprylic acid (50 to 80%), capric acid (20 to 50%), and traces of caproic acid, lauric acid and myristic acid</i></p>                   | <p>Monoglyceride : 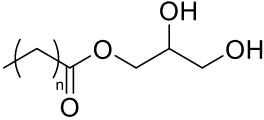</p> <p>Diglyceride:  n = 6-8</p> <p>Triglyceride: </p> <p>PEG<sub>400</sub> monoester:  n = 6-8</p> <p>PEG<sub>400</sub> diester: </p> <p><b>Mono-, di- and triglycerides of Caprylic/Capric acids (C<sub>8</sub> + C<sub>10</sub>) and PEG-8 mono- and di- esters of Caprylic/Capric acids (C<sub>8</sub> + C<sub>10</sub>)</b></p> | <ul style="list-style-type: none"> <li>• HLB = 12</li> <li>• CMC = 0.01% (v/v) at 37°C</li> </ul>                |
| <p><b>Transcutol® HP</b></p> | <p>Diethylene glycol monoethyl ether</p>                                                                                                                                                                          | <p></p> <p><b>2-(2-Ethoxyethoxy)ethanol</b></p>                                                                                                                                                                                                                                                                                                                                                                                                                                                                                                                                                                                                                                                     | <ul style="list-style-type: none"> <li>• MW = 134.17 g/mol</li> </ul>                                            |
| <p><b>Tween 80®</b></p>      | <p>Polysorbate 80</p> <p><i>Fatty acid composition: Oleic acid (≤58%), linoleic acid (18%), palmitic acid (16%), palmitoleic acid (8%), stearic acid (6%), and traces of myristic acid and linolenic acid</i></p> | <p></p> <p><b>Polyoxyethylene 20 sorbitan monooleate</b></p>                                                                                                                                                                                                                                                                                                                                                                                                                                                                                                                                                                                                                                        | <ul style="list-style-type: none"> <li>• MW = 1310 g/mol</li> <li>• HLB = 15</li> <li>• CMC = 0.01 mM</li> </ul> |

Notes: The information was obtained from the manufacturers (BASF, Gattefosé, Lipoid GmbH, IOI Oleochemical and Abitec Corporation) and from: Jannin, *et al.*, *Int. J. Pharm.* **2014**, 466, 109-121; Koga, *et al.*, *Eur. J. Pharm. Biopharm.* **2006**, 64, 82-91; Rahali *et al.*, *J. Chem. Pharm. Res.* **2014**, 6, 1543-1547; Rowe *et al.*, *Handbook of Pharmaceutical Excipients*; Tran *et al.*, *Int. J. Pharm.* **2016**, 502, 151-160; Tran, *et al.*, *Eur. J. Pharm. Sci.* **2016**, 108, 62-70.
